# Supplementary material for: Involvement of PAR-2 in the Induction of Cell-Specific Matrix Metalloproteinase-2 by Activated Protein C in Cutaneous Wound Healing
Source: MDPI journal article supplement (doi:10.3390/ijms25010370), 2023-12-27
Supplement: s1 [file s1]

Figure S1:  
 APC-stimulated wound healing was delayed in PAR-2 KO mice.

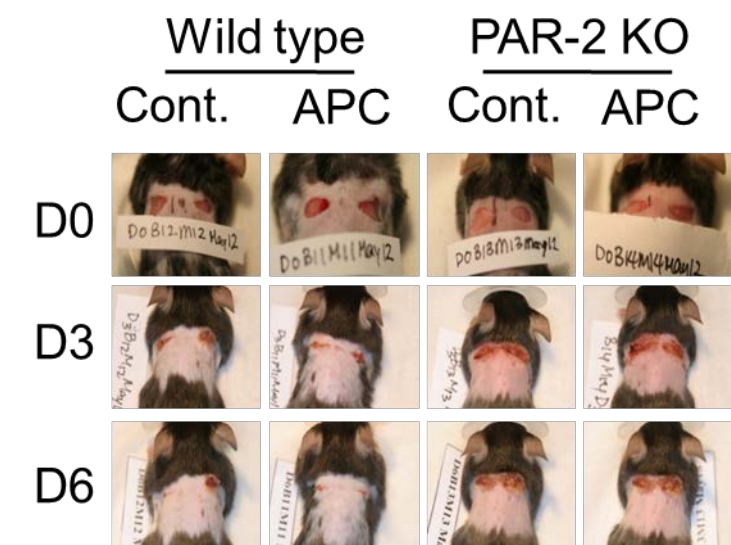

Representative photographs of skin wounds on days after PBS and APC treatment.

Figure S2:

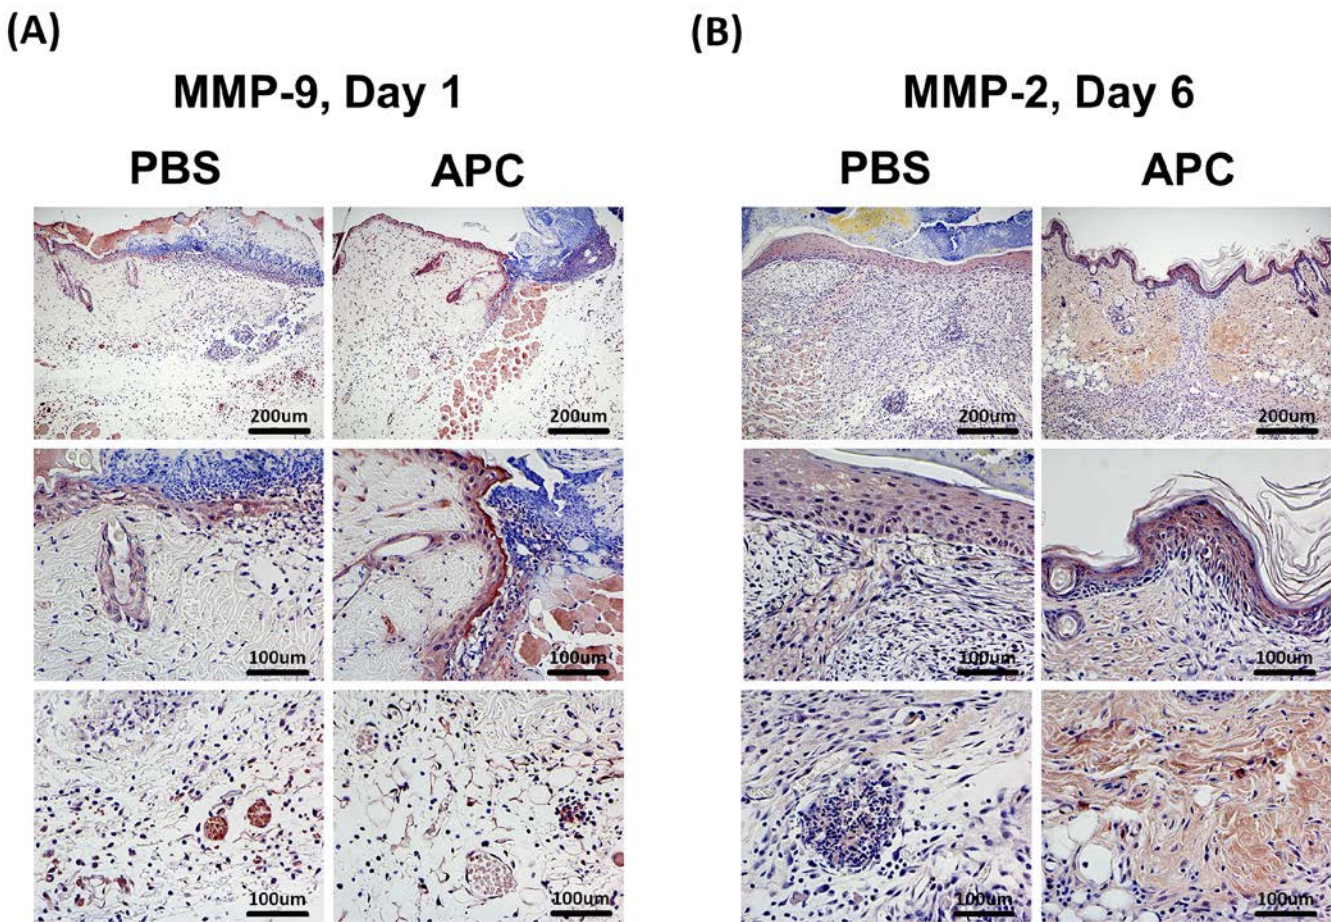

(A) Expression patterns of MMP-9 at day 1 (A) and MMP-2 at day 6 (B) by immunohistochemistry are shown to demonstrate the difference in staining level between PBS and APC-treated wounds. Scale bars, 200  $\mu$ m (upper panels) and 100  $\mu$ m (middle and lower panels).
